# Supplementary material for: Reported Adverse Effects and Attitudes among Arab Populations Following COVID-19 Vaccination: A Large-Scale Multinational Study Implementing Machine Learning Tools in Predicting Post-Vaccination Adverse Effects Based on Predisposing Factors
Source: Vaccines (Basel). 2022 Feb 26;10(3):366. doi: 10.3390/vaccines10030366 (PMC8955470; doi:10.3390/vaccines10030366)
Supplement: Supplementary file 1 [file vaccines-10-00366-s001.zip › Supplementary Tables.pdf]

## Supplementary Materials

**Table S1.** The observed frequencies that used in performing the  $\chi^2$  test.

| Predisposing factors           | Post-vaccination side effects |                                         |       |          |                                         |                                  |             |                         |         |        |                |          |          |                     |               |           |        |                                                  |
|--------------------------------|-------------------------------|-----------------------------------------|-------|----------|-----------------------------------------|----------------------------------|-------------|-------------------------|---------|--------|----------------|----------|----------|---------------------|---------------|-----------|--------|--------------------------------------------------|
|                                | Tiredness                     | Anxiety, depression and sleep disorders | Fever | Headache | Haziness or lack-of-clarity in eyesight | Injection site pain and swelling | Joints pain | Swollen ankles and feet | Myalgia | Nausea | Abdominal pain | Diarrhea | Vomiting | Bruises on the body | Bleeding gums | Nosebleed | Chills | Itchy skin, or irritation and allergic reactions |
| <b>Gender</b>                  |                               |                                         |       |          |                                         |                                  |             |                         |         |        |                |          |          |                     |               |           |        |                                                  |
| Male                           | 0.49                          | 0.22                                    | 0.35  | 0.36     | 0.1                                     | 0.47                             | 0.3         | 0.02                    | 0.34    | 0.1    | 0.1            | 0.09     | 0.03     | 0.02                | 0.01          | 0.01      | 0.21   | 0.06                                             |
| Female                         | 0.67                          | 0.31                                    | 0.43  | 0.52     | 0.15                                    | 0.67                             | 0.43        | 0.07                    | 0.47    | 0.22   | 0.18           | 0.13     | 0.05     | 0.06                | 0.02          | 0.01      | 0.33   | 0.1                                              |
| <b>Age (years)</b>             |                               |                                         |       |          |                                         |                                  |             |                         |         |        |                |          |          |                     |               |           |        |                                                  |
| < 20                           | 0.46                          | 0.19                                    | 0.25  | 0.37     | 0.08                                    | 0.5                              | 0.22        | 0.01                    | 0.29    | 0.13   | 0.13           | 0.07     | 0.03     | 0.02                | 0.01          | 0.02      | 0.15   | 0.05                                             |
| 20 - 39                        | 0.64                          | 0.3                                     | 0.43  | 0.48     | 0.14                                    | 0.63                             | 0.4         | 0.04                    | 0.45    | 0.19   | 0.17           | 0.13     | 0.05     | 0.05                | 0.02          | 0.01      | 0.3    | 0.08                                             |
| 40 - 59                        | 0.55                          | 0.25                                    | 0.38  | 0.43     | 0.13                                    | 0.53                             | 0.38        | 0.06                    | 0.39    | 0.14   | 0.11           | 0.1      | 0.03     | 0.04                | 0.02          | 0.01      | 0.27   | 0.08                                             |
| > 60                           | 0.38                          | 0.15                                    | 0.29  | 0.28     | 0.08                                    | 0.39                             | 0.24        | 0.05                    | 0.26    | 0.09   | 0.06           | 0.07     | 0.02     | 0.03                | 0.01          | 0.02      | 0.17   | 0.06                                             |
| <b>Education level</b>         |                               |                                         |       |          |                                         |                                  |             |                         |         |        |                |          |          |                     |               |           |        |                                                  |
| High school or less            | 0.52                          | 0.25                                    | 0.36  | 0.41     | 0.13                                    | 0.5                              | 0.35        | 0.06                    | 0.35    | 0.15   | 0.14           | 0.11     | 0.04     | 0.04                | 0.02          | 0.02      | 0.23   | 0.08                                             |
| Undergraduate                  | 0.61                          | 0.29                                    | 0.41  | 0.47     | 0.13                                    | 0.61                             | 0.39        | 0.04                    | 0.44    | 0.18   | 0.15           | 0.12     | 0.04     | 0.05                | 0.01          | 0.01      | 0.29   | 0.08                                             |
| Postgraduate                   | 0.56                          | 0.24                                    | 0.37  | 0.41     | 0.11                                    | 0.55                             | 0.35        | 0.04                    | 0.38    | 0.14   | 0.13           | 0.1      | 0.03     | 0.04                | 0.02          | 0.01      | 0.27   | 0.08                                             |
| <b>Being healthcare worker</b> |                               |                                         |       |          |                                         |                                  |             |                         |         |        |                |          |          |                     |               |           |        |                                                  |
| Yes                            | 0.6                           | 0.26                                    | 0.42  | 0.45     | 0.11                                    | 0.6                              | 0.36        | 0.03                    | 0.42    | 0.15   | 0.12           | 0.09     | 0.04     | 0.04                | 0.01          | 0.02      | 0.28   | 0.07                                             |
| No                             | 0.58                          | 0.28                                    | 0.38  | 0.45     | 0.14                                    | 0.57                             | 0.38        | 0.05                    | 0.41    | 0.17   | 0.15           | 0.12     | 0.04     | 0.05                | 0.02          | 0.01      | 0.27   | 0.09                                             |
| <b>Country</b>                 |                               |                                         |       |          |                                         |                                  |             |                         |         |        |                |          |          |                     |               |           |        |                                                  |
| Jordan                         | 0.67                          | 0.35                                    | 0.4   | 0.51     | 0.19                                    | 0.62                             | 0.46        | 0.09                    | 0.48    | 0.21   | 0.19           | 0.16     | 0.04     | 0.08                | 0.03          | 0.03      | 0.37   | 0.11                                             |

|                                 |      |      |      |      |      |      |      |      |      |      |      |      |      |      |      |      |      |      |
|---------------------------------|------|------|------|------|------|------|------|------|------|------|------|------|------|------|------|------|------|------|
| Lebanon                         | 0.52 | 0.18 | 0.25 | 0.38 | 0.08 | 0.54 | 0.26 | 0.02 | 0.33 | 0.13 | 0.12 | 0.09 | 0.03 | 0.02 | 0.01 | 0.01 | 0.17 | 0.04 |
| Saudi Arabia                    | 0.59 | 0.23 | 0.4  | 0.43 | 0.11 | 0.63 | 0.35 | 0.04 | 0.42 | 0.13 | 0.09 | 0.07 | 0.03 | 0.04 | 0.02 | 0.01 | 0.23 | 0.07 |
| Iraq                            | 0.67 | 0.34 | 0.59 | 0.55 | 0.15 | 0.72 | 0.5  | 0.03 | 0.51 | 0.2  | 0.16 | 0.11 | 0.04 | 0.05 | 0.02 | 0.01 | 0.31 | 0.09 |
| Egypt                           | 0.76 | 0.41 | 0.55 | 0.58 | 0.23 | 0.67 | 0.48 | 0.07 | 0.56 | 0.22 | 0.22 | 0.17 | 0.07 | 0.08 | 0.02 | 0.01 | 0.4  | 0.12 |
| Palestine                       | 0.67 | 0.32 | 0.48 | 0.53 | 0.12 | 0.63 | 0.46 | 0.05 | 0.47 | 0.19 | 0.15 | 0.13 | 0.06 | 0.04 | 0.02 | 0.02 | 0.42 | 0.06 |
| Tunisia                         | 0.5  | 0.26 | 0.36 | 0.39 | 0.09 | 0.54 | 0.36 | 0.05 | 0.29 | 0.12 | 0.12 | 0.07 | 0.04 | 0.02 | 0.02 | 0.01 | 0.26 | 0.06 |
| Qatar                           | 0.69 | 0.24 | 0.51 | 0.52 | 0.08 | 0.67 | 0.46 | 0.02 | 0.47 | 0.19 | 0.16 | 0.1  | 0.04 | 0.03 | 0.01 | 0    | 0.41 | 0.1  |
| Kuwait                          | 0.74 | 0.32 | 0.49 | 0.54 | 0.17 | 0.69 | 0.49 | 0.05 | 0.52 | 0.19 | 0.2  | 0.16 | 0.03 | 0.07 | 0.01 | 0.01 | 0.39 | 0.1  |
| Algeria                         | 0.42 | 0.23 | 0.36 | 0.35 | 0.12 | 0.37 | 0.3  | 0.04 | 0.29 | 0.14 | 0.15 | 0.14 | 0.04 | 0.02 | 0.01 | 0.01 | 0.2  | 0.08 |
| Libya                           | 0.47 | 0.25 | 0.36 | 0.37 | 0.09 | 0.43 | 0.34 | 0.04 | 0.31 | 0.14 | 0.12 | 0.11 | 0.03 | 0.04 | 0    | 0    | 0.22 | 0.06 |
| Syria                           | 0.33 | 0.17 | 0.3  | 0.23 | 0.07 | 0.28 | 0.19 | 0.03 | 0.21 | 0.11 | 0.08 | 0.06 | 0.01 | 0.03 | 0.02 | 0.04 | 0.19 | 0.09 |
| Morocco                         | 0.49 | 0.25 | 0.35 | 0.35 | 0.13 | 0.41 | 0.33 | 0.02 | 0.35 | 0.19 | 0.15 | 0.13 | 0.06 | 0.04 | 0.02 | 0.02 | 0.28 | 0.06 |
| Bahrain                         | 0.38 | 0.17 | 0.22 | 0.3  | 0.06 | 0.4  | 0.25 | 0.03 | 0.28 | 0.13 | 0.06 | 0.03 | 0.04 | 0.04 | 0.01 | 0    | 0.09 | 0.07 |
| UAE                             | 0.46 | 0.16 | 0.21 | 0.36 | 0.08 | 0.45 | 0.29 | 0.06 | 0.3  | 0.13 | 0.11 | 0.1  | 0.01 | 0.04 | 0.02 | 0.01 | 0.24 | 0.07 |
| Oman                            | 0.57 | 0.18 | 0.29 | 0.5  | 0.11 | 0.55 | 0.3  | 0.04 | 0.42 | 0.12 | 0.04 | 0.05 | 0.03 | 0.04 | 0.03 | 0.01 | 0.21 | 0.04 |
| Sudan                           | 0.6  | 0.27 | 0.41 | 0.4  | 0.13 | 0.7  | 0.37 | 0.02 | 0.37 | 0.13 | 0.14 | 0.1  | 0.02 | 0.03 | 0    | 0.02 | 0.17 | 0.05 |
| Yemen                           | 0.56 | 0.12 | 0.38 | 0.42 | 0.1  | 0.54 | 0.3  | 0.02 | 0.4  | 0.14 | 0.14 | 0.08 | 0.02 | 0.02 | 0.02 | 0.04 | 0.32 | 0.08 |
| Mauritania                      | 0.55 | 0.18 | 0.36 | 0.36 | 0    | 0.36 | 0.36 | 0    | 0.36 | 0.18 | 0.18 | 0    | 0.09 | 0.09 | 0    | 0    | 0.36 | 0    |
| <b>Type of COVID-19 vaccine</b> |      |      |      |      |      |      |      |      |      |      |      |      |      |      |      |      |      |      |
| AstraZeneca                     | 0.73 | 0.36 | 0.62 | 0.58 | 0.17 | 0.67 | 0.52 | 0.06 | 0.55 | 0.21 | 0.17 | 0.14 | 0.05 | 0.06 | 0.02 | 0.02 | 0.43 | 0.1  |
| Pfizer-BioNTech                 | 0.58 | 0.25 | 0.35 | 0.44 | 0.11 | 0.63 | 0.35 | 0.04 | 0.4  | 0.15 | 0.13 | 0.1  | 0.03 | 0.04 | 0.01 | 0.01 | 0.24 | 0.07 |
| Sinopharm                       | 0.61 | 0.3  | 0.42 | 0.46 | 0.15 | 0.59 | 0.42 | 0.06 | 0.44 | 0.2  | 0.17 | 0.12 | 0.05 | 0.06 | 0.01 | 0.02 | 0.32 | 0.1  |
| Johnson &<br>Johnson            | 0.59 | 0.24 | 0.31 | 0.47 | 0.17 | 0.53 | 0.33 | 0.05 | 0.29 | 0.14 | 0.12 | 0.07 | 0.02 | 0.03 | 0.02 | 0.03 | 0.22 | 0.05 |
| Moderna                         | 0.54 | 0.24 | 0.36 | 0.4  | 0.14 | 0.5  | 0.38 | 0.04 | 0.36 | 0.17 | 0.11 | 0.06 | 0.06 | 0.06 | 0.02 | 0.01 | 0.29 | 0.07 |
| Sputnik V                       | 0.61 | 0.3  | 0.42 | 0.46 | 0.14 | 0.58 | 0.4  | 0.06 | 0.42 | 0.17 | 0.15 | 0.13 | 0.05 | 0.05 | 0.02 | 0.02 | 0.29 | 0.1  |
| SinoVac                         | 0.59 | 0.27 | 0.42 | 0.48 | 0.13 | 0.56 | 0.36 | 0.04 | 0.39 | 0.17 | 0.15 | 0.12 | 0.04 | 0.05 | 0.02 | 0.01 | 0.25 | 0.08 |
| <b>Number of doses</b>          |      |      |      |      |      |      |      |      |      |      |      |      |      |      |      |      |      |      |
| One                             | 0.57 | 0.28 | 0.36 | 0.42 | 0.13 | 0.57 | 0.35 | 0.05 | 0.39 | 0.17 | 0.15 | 0.12 | 0.04 | 0.05 | 0.01 | 0.01 | 0.24 | 0.08 |

|                                                                                     |      |      |      |      |      |      |      |      |      |      |      |      |      |      |      |      |      |      |
|-------------------------------------------------------------------------------------|------|------|------|------|------|------|------|------|------|------|------|------|------|------|------|------|------|------|
| Two                                                                                 | 0.61 | 0.26 | 0.43 | 0.48 | 0.12 | 0.6  | 0.41 | 0.04 | 0.44 | 0.16 | 0.14 | 0.11 | 0.04 | 0.05 | 0.02 | 0.02 | 0.32 | 0.08 |
| <b>Suffering from chronic diseases</b>                                              |      |      |      |      |      |      |      |      |      |      |      |      |      |      |      |      |      |      |
| No                                                                                  | 0.82 | 0.37 | 0.54 | 0.62 | 0.16 | 0.82 | 0.5  | 0.05 | 0.56 | 0.23 | 0.19 | 0.14 | 0.05 | 0.06 | 0.02 | 0.02 | 0.37 | 0.1  |
| Diabetes                                                                            | 0.21 | 0.09 | 0.15 | 0.16 | 0.04 | 0.21 | 0.14 | 0.01 | 0.15 | 0.07 | 0.05 | 0.03 | 0.02 | 0.01 | 0.01 | 0    | 0.12 | 0.02 |
| Hypertension                                                                        | 0.28 | 0.12 | 0.19 | 0.2  | 0.07 | 0.27 | 0.16 | 0.03 | 0.18 | 0.07 | 0.07 | 0.05 | 0.02 | 0.02 | 0.01 | 0    | 0.13 | 0.03 |
| Cardiovascular                                                                      | 0.25 | 0.13 | 0.16 | 0.2  | 0.08 | 0.26 | 0.16 | 0.03 | 0.19 | 0.09 | 0.08 | 0.05 | 0.02 | 0.02 | 0    | 0    | 0.13 | 0.03 |
| Respiratory<br>disease                                                              | 0.37 | 0.16 | 0.25 | 0.28 | 0.09 | 0.34 | 0.26 | 0.03 | 0.25 | 0.11 | 0.1  | 0.09 | 0.03 | 0.03 | 0    | 0.01 | 0.17 | 0.06 |
| Obesity                                                                             | 0.36 | 0.15 | 0.24 | 0.25 | 0.08 | 0.33 | 0.21 | 0.03 | 0.24 | 0.09 | 0.09 | 0.06 | 0.03 | 0.03 | 0.01 | 0.01 | 0.18 | 0.03 |
| Arthritis                                                                           | 0.27 | 0.13 | 0.2  | 0.22 | 0.06 | 0.24 | 0.17 | 0.02 | 0.17 | 0.08 | 0.04 | 0.03 | 0.01 | 0.02 | 0    | 0.01 | 0.12 | 0.04 |
| Autoimmune<br>diseases                                                              | 0.38 | 0.19 | 0.22 | 0.27 | 0.08 | 0.34 | 0.22 | 0.04 | 0.22 | 0.1  | 0.07 | 0.06 | 0.01 | 0.03 | 0.01 | 0    | 0.16 | 0.03 |
| Thyroid<br>dysfunctions                                                             | 0.36 | 0.13 | 0.25 | 0.24 | 0.08 | 0.35 | 0.22 | 0.03 | 0.25 | 0.1  | 0.09 | 0.07 | 0.02 | 0.02 | 0.01 | 0.01 | 0.19 | 0.04 |
| Cancers                                                                             | 0.37 | 0.2  | 0.14 | 0.24 | 0.08 | 0.39 | 0.2  | 0.04 | 0.22 | 0.08 | 0.06 | 0.04 | 0.04 | 0.02 | 0.02 | 0.02 | 0.14 | 0.04 |
| More than one<br>disease                                                            | 0.6  | 0.25 | 0.38 | 0.44 | 0.13 | 0.57 | 0.4  | 0.04 | 0.43 | 0.17 | 0.15 | 0.12 | 0.04 | 0.04 | 0.01 | 0.02 | 0.27 | 0.08 |
| <b>Being smoker</b>                                                                 |      |      |      |      |      |      |      |      |      |      |      |      |      |      |      |      |      |      |
| Yes                                                                                 | 0.57 | 0.28 | 0.38 | 0.43 | 0.14 | 0.56 | 0.38 | 0.04 | 0.42 | 0.15 | 0.14 | 0.11 | 0.04 | 0.05 | 0.02 | 0.02 | 0.28 | 0.08 |
| No                                                                                  | 0.6  | 0.27 | 0.4  | 0.45 | 0.12 | 0.59 | 0.37 | 0.05 | 0.41 | 0.17 | 0.14 | 0.11 | 0.04 | 0.05 | 0.01 | 0.01 | 0.28 | 0.08 |
| <b>Suffering from food and drug allergies</b>                                       |      |      |      |      |      |      |      |      |      |      |      |      |      |      |      |      |      |      |
| Yes                                                                                 | 0.63 | 0.31 | 0.44 | 0.52 | 0.16 | 0.64 | 0.43 | 0.07 | 0.46 | 0.22 | 0.18 | 0.13 | 0.06 | 0.07 | 0.03 | 0.02 | 0.32 | 0.14 |
| No                                                                                  | 0.58 | 0.27 | 0.39 | 0.44 | 0.12 | 0.57 | 0.37 | 0.04 | 0.41 | 0.16 | 0.14 | 0.11 | 0.04 | 0.04 | 0.01 | 0.01 | 0.27 | 0.07 |
| <b>Experiencing COVID-19 vaccine hesitancy and related fears before vaccination</b> |      |      |      |      |      |      |      |      |      |      |      |      |      |      |      |      |      |      |
| Yes                                                                                 | 0.66 | 0.35 | 0.44 | 0.51 | 0.17 | 0.64 | 0.44 | 0.07 | 0.47 | 0.21 | 0.18 | 0.14 | 0.05 | 0.06 | 0.02 | 0.02 | 0.33 | 0.1  |
| No                                                                                  | 0.52 | 0.19 | 0.35 | 0.38 | 0.08 | 0.52 | 0.31 | 0.02 | 0.35 | 0.12 | 0.1  | 0.08 | 0.03 | 0.03 | 0.01 | 0.01 | 0.22 | 0.05 |
| <b>Experiencing COVID-19 infection before receiving any vaccine dose</b>            |      |      |      |      |      |      |      |      |      |      |      |      |      |      |      |      |      |      |
| Yes                                                                                 | 0.65 | 0.27 | 0.39 | 0.44 | 0.14 | 0.58 | 0.38 | 0.05 | 0.42 | 0.17 | 0.14 | 0.11 | 0.04 | 0.05 | 0.02 | 0.02 | 0.27 | 0.08 |
| No                                                                                  | 0.57 | 0.27 | 0.39 | 0.45 | 0.12 | 0.58 | 0.37 | 0.05 | 0.41 | 0.16 | 0.14 | 0.11 | 0.04 | 0.04 | 0.01 | 0.01 | 0.28 | 0.08 |

| Predisposing factors           | Post-vaccination side effects |                                      |           |              |            |         |            |                         |                      |                         |                    |       | Severity of post-vaccination side effects |      |          |        |
|--------------------------------|-------------------------------|--------------------------------------|-----------|--------------|------------|---------|------------|-------------------------|----------------------|-------------------------|--------------------|-------|-------------------------------------------|------|----------|--------|
|                                | Sweating for no reason        | Cold, numbness and tingling in limbs | Dizziness | Clogged nose | Runny nose | Dyspnea | Chest pain | Sleepiness and laziness | Irregular heartbeats | Abnormal blood pressure | Sore or dry throat | Cough | None                                      | Mild | Moderate | Severe |
| <b>Gender</b>                  |                               |                                      |           |              |            |         |            |                         |                      |                         |                    |       |                                           |      |          |        |
| Male                           | 0.16                          | 0.16                                 | 0.2       | 0.11         | 0.08       | 0.09    | 0.1        | 0.37                    | 0.11                 | 0.06                    | 0.13               | 0.07  | 0.36                                      | 0.38 | 0.18     | 0.07   |
| Female                         | 0.21                          | 0.24                                 | 0.35      | 0.15         | 0.12       | 0.14    | 0.13       | 0.53                    | 0.19                 | 0.1                     | 0.21               | 0.1   | 0.13                                      | 0.43 | 0.26     | 0.11   |
| <b>Age</b>                     |                               |                                      |           |              |            |         |            |                         |                      |                         |                    |       |                                           |      |          |        |
| < 20                           | 0.14                          | 0.14                                 | 0.23      | 0.1          | 0.08       | 0.1     | 0.07       | 0.36                    | 0.09                 | 0.04                    | 0.12               | 0.05  | 0.42                                      | 0.42 | 0.13     | 0.03   |
| 20 - 39                        | 0.2                           | 0.23                                 | 0.32      | 0.15         | 0.12       | 0.13    | 0.13       | 0.51                    | 0.17                 | 0.09                    | 0.2                | 0.1   | 0.24                                      | 0.41 | 0.24     | 0.11   |
| 40 - 59                        | 0.19                          | 0.19                                 | 0.25      | 0.12         | 0.09       | 0.1     | 0.1        | 0.42                    | 0.14                 | 0.08                    | 0.16               | 0.07  | 0.29                                      | 0.4  | 0.22     | 0.09   |
| > 60                           | 0.13                          | 0.12                                 | 0.17      | 0.08         | 0.09       | 0.06    | 0.05       | 0.28                    | 0.08                 | 0.07                    | 0.13               | 0.08  | 0.4                                       | 0.41 | 0.14     | 0.06   |
| <b>Education level</b>         |                               |                                      |           |              |            |         |            |                         |                      |                         |                    |       |                                           |      |          |        |
| High school or less            | 0.2                           | 0.2                                  | 0.24      | 0.13         | 0.11       | 0.12    | 0.12       | 0.41                    | 0.14                 | 0.09                    | 0.18               | 0.1   | 0.33                                      | 0.39 | 0.2      | 0.08   |
| Undergraduate                  | 0.2                           | 0.22                                 | 0.3       | 0.14         | 0.11       | 0.13    | 0.12       | 0.48                    | 0.16                 | 0.08                    | 0.19               | 0.09  | 0.26                                      | 0.41 | 0.23     | 0.1    |
| Postgraduate                   | 0.17                          | 0.18                                 | 0.26      | 0.11         | 0.09       | 0.1     | 0.1        | 0.42                    | 0.13                 | 0.07                    | 0.15               | 0.07  | 0.29                                      | 0.41 | 0.21     | 0.09   |
| <b>Being healthcare worker</b> |                               |                                      |           |              |            |         |            |                         |                      |                         |                    |       |                                           |      |          |        |
| Yes                            | 0.17                          | 0.19                                 | 0.26      | 0.13         | 0.1        | 0.1     | 0.1        | 0.44                    | 0.14                 | 0.07                    | 0.15               | 0.08  | 0.27                                      | 0.41 | 0.22     | 0.09   |
| No                             | 0.2                           | 0.21                                 | 0.29      | 0.13         | 0.11       | 0.12    | 0.12       | 0.47                    | 0.16                 | 0.09                    | 0.19               | 0.09  | 0.28                                      | 0.41 | 0.22     | 0.09   |
| <b>Country</b>                 |                               |                                      |           |              |            |         |            |                         |                      |                         |                    |       |                                           |      |          |        |
| Jordan                         | 0.23                          | 0.26                                 | 0.35      | 0.18         | 0.13       | 0.18    | 0.18       | 0.54                    | 0.2                  | 0.12                    | 0.26               | 0.11  | 0.24                                      | 0.4  | 0.24     | 0.11   |

|                                 |      |      |      |      |      |      |      |      |      |      |      |      |      |      |      |      |
|---------------------------------|------|------|------|------|------|------|------|------|------|------|------|------|------|------|------|------|
| Lebanon                         | 0.13 | 0.14 | 0.22 | 0.1  | 0.07 | 0.08 | 0.06 | 0.41 | 0.08 | 0.04 | 0.12 | 0.06 | 0.36 | 0.45 | 0.15 | 0.04 |
| Saudi Arabia                    | 0.15 | 0.18 | 0.22 | 0.09 | 0.09 | 0.09 | 0.08 | 0.42 | 0.12 | 0.06 | 0.13 | 0.05 | 0.24 | 0.43 | 0.24 | 0.09 |
| Iraq                            | 0.24 | 0.27 | 0.39 | 0.17 | 0.16 | 0.14 | 0.16 | 0.56 | 0.21 | 0.13 | 0.22 | 0.12 | 0.15 | 0.43 | 0.28 | 0.13 |
| Egypt                           | 0.24 | 0.28 | 0.45 | 0.21 | 0.15 | 0.19 | 0.18 | 0.6  | 0.29 | 0.16 | 0.26 | 0.11 | 0.15 | 0.35 | 0.32 | 0.19 |
| Palestine                       | 0.25 | 0.24 | 0.3  | 0.14 | 0.1  | 0.13 | 0.13 | 0.48 | 0.17 | 0.09 | 0.2  | 0.12 | 0.24 | 0.38 | 0.27 | 0.11 |
| Tunisia                         | 0.25 | 0.18 | 0.23 | 0.12 | 0.1  | 0.05 | 0.09 | 0.39 | 0.13 | 0.05 | 0.18 | 0.09 | 0.29 | 0.43 | 0.22 | 0.06 |
| Qatar                           | 0.22 | 0.24 | 0.29 | 0.09 | 0.08 | 0.1  | 0.08 | 0.49 | 0.11 | 0.05 | 0.14 | 0.05 | 0.19 | 0.4  | 0.29 | 0.13 |
| Kuwait                          | 0.23 | 0.33 | 0.38 | 0.14 | 0.12 | 0.16 | 0.17 | 0.6  | 0.15 | 0.1  | 0.2  | 0.13 | 0.16 | 0.41 | 0.13 | 0    |
| Algeria                         | 0.22 | 0.19 | 0.23 | 0.14 | 0.09 | 0.11 | 0.12 | 0.35 | 0.16 | 0.07 | 0.18 | 0.08 | 0.4  | 0.36 | 0.18 | 0.07 |
| Libya                           | 0.17 | 0.18 | 0.23 | 0.11 | 0.08 | 0.08 | 0.07 | 0.34 | 0.11 | 0.05 | 0.18 | 0.06 | 0.4  | 0.35 | 0.18 | 0.07 |
| Syria                           | 0.17 | 0.13 | 0.16 | 0.11 | 0.11 | 0.09 | 0.07 | 0.25 | 0.11 | 0.06 | 0.1  | 0.09 | 0.6  | 0.21 | 0.13 | 0.06 |
| Morocco                         | 0.2  | 0.2  | 0.3  | 0.14 | 0.08 | 0.14 | 0.14 | 0.45 | 0.19 | 0.1  | 0.17 | 0.12 | 0.33 | 0.36 | 0.24 | 0.07 |
| Bahrain                         | 0.1  | 0.12 | 0.17 | 0.06 | 0.07 | 0.07 | 0.06 | 0.35 | 0.04 | 0.06 | 0.08 | 0.04 | 0.42 | 0.37 | 0.15 | 0.06 |
| UAE                             | 0.1  | 0.17 | 0.18 | 0.07 | 0.06 | 0.05 | 0.12 | 0.33 | 0.08 | 0.05 | 0.13 | 0.06 | 0.38 | 0.43 | 0.15 | 0.04 |
| Oman                            | 0.11 | 0.18 | 0.24 | 0.09 | 0.07 | 0.07 | 0.07 | 0.39 | 0.07 | 0.01 | 0.17 | 0.01 | 0.17 | 0.59 | 0.16 | 0.08 |
| Sudan                           | 0.08 | 0.14 | 0.22 | 0.11 | 0.11 | 0.13 | 0.1  | 0.46 | 0.13 | 0.02 | 0.08 | 0.06 | 0.22 | 0.51 | 0.19 | 0.08 |
| Yemen                           | 0.16 | 0.3  | 0.28 | 0.12 | 0.14 | 0.08 | 0.12 | 0.44 | 0.06 | 0.06 | 0.14 | 0.12 | 0.28 | 0.48 | 0.24 | 0    |
| Mauritania                      | 0.18 | 0.09 | 0.18 | 0.18 | 0    | 0.09 | 0.09 | 0.36 | 0.09 | 0.09 | 0.09 | 0.09 | 0.27 | 0.55 | 0.09 | 0.09 |
| <b>Type of COVID-19 vaccine</b> |      |      |      |      |      |      |      |      |      |      |      |      |      |      |      |      |
| AstraZeneca                     | 0.26 | 0.3  | 0.37 | 0.16 | 0.12 | 0.15 | 0.16 | 0.54 | 0.21 | 0.12 | 0.22 | 0.11 | 0.16 | 0.31 | 0.33 | 0.2  |
| Pfizer-BioNTech                 | 0.17 | 0.18 | 0.26 | 0.12 | 0.1  | 0.11 | 0.1  | 0.45 | 0.13 | 0.07 | 0.16 | 0.08 | 0.27 | 0.45 | 0.21 | 0.07 |
| Sinopharm                       | 0.23 | 0.24 | 0.32 | 0.15 | 0.11 | 0.14 | 0.15 | 0.5  | 0.18 | 0.1  | 0.21 | 0.11 | 0.39 | 0.43 | 0.15 | 0.03 |
| Johnson &<br>Johnson            | 0.26 | 0.19 | 0.24 | 0.12 | 0.16 | 0.09 | 0.12 | 0.41 | 0.16 | 0.05 | 0.1  | 0.07 | 0.05 | 0.24 | 0.45 | 0.26 |
| Moderna                         | 0.17 | 0.19 | 0.24 | 0.17 | 0.12 | 0.12 | 0.14 | 0.41 | 0.16 | 0.05 | 0.17 | 0.08 | 0.16 | 0.32 | 0.3  | 0.22 |
| Sputnik V                       | 0.21 | 0.21 | 0.31 | 0.14 | 0.11 | 0.13 | 0.11 | 0.47 | 0.18 | 0.1  | 0.19 | 0.11 | 0.35 | 0.37 | 0.22 | 0.06 |
| SinoVac                         | 0.21 | 0.21 | 0.29 | 0.15 | 0.11 | 0.13 | 0.13 | 0.47 | 0.15 | 0.09 | 0.2  | 0.09 | 0.46 | 0.35 | 0.13 | 0.06 |
| <b>Number of doses</b>          |      |      |      |      |      |      |      |      |      |      |      |      |      |      |      |      |
| One                             | 0.19 | 0.21 | 0.29 | 0.13 | 0.11 | 0.12 | 0.12 | 0.45 | 0.15 | 0.08 | 0.19 | 0.09 | 0.29 | 0.41 | 0.2  | 0.09 |

|                                                                                     |      |      |      |      |      |      |      |      |      |      |      |      |      |      |      |      |
|-------------------------------------------------------------------------------------|------|------|------|------|------|------|------|------|------|------|------|------|------|------|------|------|
| Two                                                                                 | 0.19 | 0.21 | 0.28 | 0.13 | 0.11 | 0.11 | 0.11 | 0.47 | 0.15 | 0.08 | 0.17 | 0.08 | 0.25 | 0.4  | 0.25 | 0.1  |
| <b>Suffering from chronic diseases</b>                                              |      |      |      |      |      |      |      |      |      |      |      |      |      |      |      |      |
| No                                                                                  | 0.25 | 0.28 | 0.39 | 0.17 | 0.13 | 0.16 | 0.15 | 0.64 | 0.19 | 0.1  | 0.23 | 0.11 | 0.4  | 0.57 | 0.31 | 0.12 |
| Diabetes                                                                            | 0.08 | 0.07 | 0.11 | 0.04 | 0.04 | 0.04 | 0.05 | 0.19 | 0.06 | 0.02 | 0.07 | 0.03 | 0.13 | 0.15 | 0.06 | 0.03 |
| Hypertension                                                                        | 0.09 | 0.09 | 0.14 | 0.06 | 0.04 | 0.05 | 0.05 | 0.22 | 0.07 | 0.03 | 0.08 | 0.04 | 0.11 | 0.18 | 0.11 | 0.05 |
| Cardiovascular                                                                      | 0.09 | 0.1  | 0.14 | 0.03 | 0.04 | 0.06 | 0.05 | 0.19 | 0.1  | 0.05 | 0.07 | 0.03 | 0.12 | 0.15 | 0.08 | 0.04 |
| Respiratory diseases                                                                | 0.11 | 0.12 | 0.18 | 0.09 | 0.07 | 0.07 | 0.07 | 0.29 | 0.09 | 0.05 | 0.12 | 0.06 | 0.11 | 0.25 | 0.2  | 0.05 |
| Obesity                                                                             | 0.12 | 0.11 | 0.17 | 0.08 | 0.06 | 0.06 | 0.06 | 0.28 | 0.06 | 0.04 | 0.11 | 0.05 | 0.12 | 0.24 | 0.13 | 0.06 |
| Arthritis                                                                           | 0.1  | 0.09 | 0.12 | 0.05 | 0.03 | 0.04 | 0.05 | 0.19 | 0.07 | 0.06 | 0.08 | 0.04 | 0.11 | 0.19 | 0.1  | 0.06 |
| Autoimmunity                                                                        | 0.09 | 0.12 | 0.17 | 0.07 | 0.07 | 0.08 | 0.07 | 0.31 | 0.12 | 0.04 | 0.11 | 0.05 | 0.17 | 0.24 | 0.13 | 0.1  |
| Thyroid dysfunctions                                                                | 0.12 | 0.11 | 0.17 | 0.07 | 0.08 | 0.07 | 0.08 | 0.3  | 0.1  | 0.05 | 0.13 | 0.05 | 0.11 | 0.25 | 0.16 | 0.06 |
| Cancers                                                                             | 0.1  | 0.14 | 0.14 | 0.06 | 0.08 | 0.04 | 0.1  | 0.27 | 0.1  | 0.08 | 0.1  | 0.06 | 0.08 | 0.29 | 0.16 | 0.06 |
| More than one disease                                                               | 0.2  | 0.21 | 0.29 | 0.13 | 0.11 | 0.1  | 0.11 | 0.46 | 0.15 | 0.09 | 0.18 | 0.09 | 0.26 | 0.39 | 0.24 | 0.11 |
| <b>Being smoker</b>                                                                 |      |      |      |      |      |      |      |      |      |      |      |      |      |      |      |      |
| Yes                                                                                 | 0.22 | 0.21 | 0.27 | 0.14 | 0.11 | 0.12 | 0.12 | 0.47 | 0.15 | 0.08 | 0.18 | 0.08 | 0.3  | 0.39 | 0.22 | 0.09 |
| No                                                                                  | 0.18 | 0.2  | 0.29 | 0.13 | 0.11 | 0.12 | 0.11 | 0.46 | 0.15 | 0.08 | 0.18 | 0.09 | 0.27 | 0.41 | 0.23 | 0.09 |
| <b>Suffering from food and drug allergies</b>                                       |      |      |      |      |      |      |      |      |      |      |      |      |      |      |      |      |
| Yes                                                                                 | 0.24 | 0.26 | 0.33 | 0.17 | 0.14 | 0.16 | 0.16 | 0.51 | 0.21 | 0.11 | 0.24 | 0.12 | 0.23 | 0.4  | 0.24 | 0.13 |
| No                                                                                  | 0.18 | 0.2  | 0.28 | 0.13 | 0.1  | 0.11 | 0.11 | 0.45 | 0.14 | 0.08 | 0.17 | 0.08 | 0.28 | 0.41 | 0.22 | 0.09 |
| <b>Experiencing COVID-19 vaccine hesitancy and related fears before vaccination</b> |      |      |      |      |      |      |      |      |      |      |      |      |      |      |      |      |
| Yes                                                                                 | 0.23 | 0.25 | 0.35 | 0.16 | 0.13 | 0.15 | 0.15 | 0.53 | 0.2  | 0.11 | 0.22 | 0.11 | 0.22 | 0.41 | 0.26 | 0.11 |
| No                                                                                  | 0.16 | 0.16 | 0.21 | 0.11 | 0.09 | 0.08 | 0.08 | 0.39 | 0.1  | 0.05 | 0.13 | 0.07 | 0.33 | 0.41 | 0.18 | 0.07 |
| <b>Experiencing COVID-19 infection before receiving any vaccine dose</b>            |      |      |      |      |      |      |      |      |      |      |      |      |      |      |      |      |
| Yes                                                                                 | 0.19 | 0.21 | 0.28 | 0.13 | 0.11 | 0.13 | 0.13 | 0.46 | 0.16 | 0.09 | 0.18 | 0.09 | 0.23 | 0.42 | 0.25 | 0.1  |
| No                                                                                  | 0.19 | 0.21 | 0.28 | 0.13 | 0.11 | 0.11 | 0.11 | 0.46 | 0.15 | 0.08 | 0.18 | 0.08 | 0.29 | 0.4  | 0.21 | 0.09 |

**Table S2.** Correlation between categories of predisposing factors.

|              | Gender |        | Age (year) |         |         |      | Country |       |              |      |         |           |         |         |       |         |       |         |        |     | Vaccine hesitancy and related fears |    | Type of vaccine |             |                 |           |         |           | Number of doses |     | Education level |                          |               |              |  |
|--------------|--------|--------|------------|---------|---------|------|---------|-------|--------------|------|---------|-----------|---------|---------|-------|---------|-------|---------|--------|-----|-------------------------------------|----|-----------------|-------------|-----------------|-----------|---------|-----------|-----------------|-----|-----------------|--------------------------|---------------|--------------|--|
|              | Male   | Female | < 20       | 20 – 39 | 40 – 59 | > 60 | Jordan  | Egypt | Saudi Arabia | Iraq | Lebanon | Palestine | Morocco | Tunisia | Syria | Algeria | Qatar | Bahrain | Kuwait | UAE | Libya                               | No | Yes             | AstraZeneca | Pfizer-BioNTech | Sinopharm | Moderna | Sputnik V | SinoVac         | One | Two             | Secondary school or less | Undergraduate | Postgraduate |  |
| Gender       |        |        |            |         |         |      |         |       |              |      |         |           |         |         |       |         |       |         |        |     |                                     |    |                 |             |                 |           |         |           |                 |     |                 |                          |               |              |  |
| Male         | 1      |        |            |         |         |      |         |       |              |      |         |           |         |         |       |         |       |         |        |     |                                     |    |                 |             |                 |           |         |           |                 |     |                 |                          |               |              |  |
| Female       | -1     | 1      |            |         |         |      |         |       |              |      |         |           |         |         |       |         |       |         |        |     |                                     |    |                 |             |                 |           |         |           |                 |     |                 |                          |               |              |  |
| Age (year)   |        |        |            |         |         |      |         |       |              |      |         |           |         |         |       |         |       |         |        |     |                                     |    |                 |             |                 |           |         |           |                 |     |                 |                          |               |              |  |
| < 20         | -2     | 2      | 1          |         |         |      |         |       |              |      |         |           |         |         |       |         |       |         |        |     |                                     |    |                 |             |                 |           |         |           |                 |     |                 |                          |               |              |  |
| 20 – 39      | -5     | 5      | -32        | 1       |         |      |         |       |              |      |         |           |         |         |       |         |       |         |        |     |                                     |    |                 |             |                 |           |         |           |                 |     |                 |                          |               |              |  |
| 40 – 59      | 4      | -4     | -17        | -77     | 1       |      |         |       |              |      |         |           |         |         |       |         |       |         |        |     |                                     |    |                 |             |                 |           |         |           |                 |     |                 |                          |               |              |  |
| > 60         | 5      | -5     | -6         | -27     | -15     | 1    |         |       |              |      |         |           |         |         |       |         |       |         |        |     |                                     |    |                 |             |                 |           |         |           |                 |     |                 |                          |               |              |  |
| Country      |        |        |            |         |         |      |         |       |              |      |         |           |         |         |       |         |       |         |        |     |                                     |    |                 |             |                 |           |         |           |                 |     |                 |                          |               |              |  |
| Jordan       | -13    | 13     | -9         | 11      | -4      | -6   | 1       |       |              |      |         |           |         |         |       |         |       |         |        |     |                                     |    |                 |             |                 |           |         |           |                 |     |                 |                          |               |              |  |
| Egypt        | -2     | 2      | -7         | 1       | 4       | -2   | -13     | 1     |              |      |         |           |         |         |       |         |       |         |        |     |                                     |    |                 |             |                 |           |         |           |                 |     |                 |                          |               |              |  |
| Saudi Arabia | -2     | 2      | -8         | -5      | 7       | 6    | -19     | -12   | 1            |      |         |           |         |         |       |         |       |         |        |     |                                     |    |                 |             |                 |           |         |           |                 |     |                 |                          |               |              |  |
| Iraq         | 6      | -6     | -2         | 6       | -3      | -4   | -14     | -9    | -14          | 1    |         |           |         |         |       |         |       |         |        |     |                                     |    |                 |             |                 |           |         |           |                 |     |                 |                          |               |              |  |
| Lebanon      | -1     | 1      | 37         | 1       | -18     | -6   | -22     | -14   | -21          | -16  | 1       |           |         |         |       |         |       |         |        |     |                                     |    |                 |             |                 |           |         |           |                 |     |                 |                          |               |              |  |
| Palestine    | -4     | 4      |            | 4       | -4      | -2   | -11     | -7    | -1           | -8   | -12     | 1         |         |         |       |         |       |         |        |     |                                     |    |                 |             |                 |           |         |           |                 |     |                 |                          |               |              |  |



|              |   |    |    |    |   |   |    |   |    |    |    |    |    |    |   |    |    |    |    |   |    |   |   |   |    |   |    |   |    |    |   |     |     |   |
|--------------|---|----|----|----|---|---|----|---|----|----|----|----|----|----|---|----|----|----|----|---|----|---|---|---|----|---|----|---|----|----|---|-----|-----|---|
| Postgraduate | 6 | -6 | -1 | -6 | 1 | 4 | -8 | 0 | -2 | -1 | -3 | -6 | 12 | 15 | 8 | 18 | -1 | -1 | -4 | 1 | -2 | 0 | 0 | 0 | -9 | 1 | -2 | 5 | 12 | -9 | 9 | -21 | -77 | 1 |
|--------------|---|----|----|----|---|---|----|---|----|----|----|----|----|----|---|----|----|----|----|---|----|---|---|---|----|---|----|---|----|----|---|-----|-----|---|

\*Correlation between different categories from different factors with  $|R| > 40$  (indicated in yellow). Numbers written as  $n \times 100$ . UAE, United Arab Emirates.

**Table S3.** The accuracy and Cohen's values for different top predicted symptoms using backward elimination method from the least to the highest global feature importance to determine the steepest decline in prediction (GB was used as predicting ML tool).

| <b>Tiredness</b>                                                                 | <b>FI</b> | <b>A</b> | <b>C</b> | <b>Fever</b>                                                                     | <b>FI</b> | <b>A</b> | <b>C</b> |
|----------------------------------------------------------------------------------|-----------|----------|----------|----------------------------------------------------------------------------------|-----------|----------|----------|
| Being smoker                                                                     | 0.11      | 69       | 33       | Experiencing vaccine breakthrough COVID-19 infection                             | 0.057     | 69       | 31       |
| Experiencing vaccine breakthrough COVID-19 infection                             | 0.16      | 69       | 33       | Being healthcare worker                                                          | 0.18      | 69       | 32       |
| Suffering from food and drug allergies                                           | 0.17      | 68       | 33       | Being smoker                                                                     | 0.19      | 69       | 31       |
| Being healthcare worker                                                          | 0.23      | 69       | 34       | Experiencing COVID-19 infection before receiving any vaccine dose                | 0.44      | 69       | 31       |
| Experiencing COVID-19 infection before receiving any vaccine dose                | 0.52      | 68       | 33       | Suffering from food and drug allergies                                           | 0.51      | 68       | 31       |
| Interval between receiving a COVID-19 vaccine and participating in this study    | 0.6       | 68       | 32       | Interval between receiving a COVID-19 vaccine and participating in this study    | 0.66      | 68       | 31       |
| Education level                                                                  | 0.63      | 68       | 32       | Education level                                                                  | 0.71      | 69       | 31       |
| Number of doses **^                                                              | 0.77      | 68       | 32       | Gender                                                                           | 0.82      | 68       | 31       |
| Time of breakthrough infection                                                   | 0.9       | 66       | 29       | Interval between receiving a COVID-19 vaccine and participating in this study ** | 0.91      | 68       | 30       |
| Experiencing COVID-19 vaccine hesitancy and related fears before vaccination **^ | 1.22      | 67       | 29       | Time of breakthrough infection                                                   | 1.01      | 67       | 28       |
| Age                                                                              | 1.25      | 66       | 27       | Number of doses                                                                  | 1.13      | 67       | 27       |
| Suffering from chronic diseases                                                  | 1.45      | 66       | 27       | Age                                                                              | 1.53      | 67       | 26       |
| Gender **^                                                                       | 1.86      | 66       | 27       | Suffering from chronic diseases                                                  | 1.69      | 67       | 27       |
| Type of COVID-19 vaccine **^                                                     | 2.03      | 63       | 16       | Country **^                                                                      | 2.18      | 68       | 27       |
| Country **^                                                                      | 2.33      | 61       | 12       | Type of COVID-19 vaccine **^                                                     | 2.58      | 66       | 23       |

|                                                                                  |           |          |          |                                                                                 |           |          |          |
|----------------------------------------------------------------------------------|-----------|----------|----------|---------------------------------------------------------------------------------|-----------|----------|----------|
| Critical features                                                                |           | 68       | 32       | Critical features                                                               |           | 67       | 27       |
| <b>Headache</b>                                                                  | <b>FI</b> | <b>A</b> | <b>C</b> | <b>Injection site pain and swelling</b>                                         | <b>FI</b> | <b>A</b> | <b>C</b> |
| Being healthcare worker                                                          | 0.11      | 64       | 26       | Being smoker                                                                    | 0.24      | 67       | 31       |
| Suffering from food and drug allergies                                           | 0.11      | 64       | 26       | Interval between receiving a COVID-19 vaccine and participating in this study   | 0.27      | 67       | 31       |
| Being smoker                                                                     | 0.16      | 64       | 26       | Number of doses                                                                 | 0.28      | 67       | 31       |
| Experiencing vaccine breakthrough COVID-19 infection                             | 0.48      | 64       | 27       | Being healthcare worker                                                         | 0.32      | 67       | 30       |
| Education level                                                                  | 0.58      | 64       | 26       | Experiencing COVID-19 infection before receiving any vaccine dose               | 0.32      | 67       | 30       |
| Interval between receiving a COVID-19 vaccine and participating in this study    | 0.59      | 64       | 26       | Suffering from food and drug allergies                                          | 0.43      | 67       | 29       |
| Experiencing COVID-19 infection before receiving any vaccine dose                | 0.73      | 64       | 27       | Experiencing vaccine breakthrough COVID-19 infection                            | 0.45      | 66       | 29       |
| Number of doses **^                                                              | 0.83      | 64       | 27       | Time of breakthrough infection                                                  | 0.9       | 66       | 28       |
| Experiencing COVID-19 vaccine hesitancy and related fears before vaccination **^ | 1.03      | 63       | 24       | Experiencing COVID-19 vaccine hesitancy and related fears before vaccination ** | 0.92      | 67       | 30       |
| Suffering from chronic diseases                                                  | 1.23      | 63       | 22       | Education level                                                                 | 1.05      | 66       | 28       |
| Age                                                                              | 1.28      | 62       | 21       | Age                                                                             | 1.43      | 66       | 28       |
| Time of breakthrough infection                                                   | 1.48      | 62       | 21       | Suffering from chronic diseases                                                 | 1.47      | 65       | 26       |
| Gender                                                                           | 1.56      | 62       | 21       | Gender**^                                                                       | 1.71      | 66       | 27       |
| Country **^                                                                      | 2.1       | 61       | 20       | Country**^                                                                      | 2.18      | 64       | 22       |
| Type of COVID-19 vaccine **^                                                     | 2.34      | 59       | 13       | Type of COVID-19 vaccine **^                                                    | 2.48      | 63       | 18       |
| Critical features                                                                |           | 62       | 23       | Critical features                                                               |           | 66       | 27       |
| <b>Myalgia</b>                                                                   | <b>FI</b> | <b>A</b> | <b>C</b> | <b>Numbness and tingling in limbs</b>                                           | <b>FI</b> | <b>A</b> | <b>C</b> |
| Being smoker                                                                     | 0.04      | 66       | 27       | Being healthcare worker                                                         | 0.14      | 74       | 23       |
| Being healthcare worker                                                          | 0.08      | 66       | 27       | Experiencing COVID-19 infection before receiving any vaccine dose               | 0.15      | 74       | 23       |

|                                                                               |           |          |          |                                                                                  |      |    |    |
|-------------------------------------------------------------------------------|-----------|----------|----------|----------------------------------------------------------------------------------|------|----|----|
| Experiencing vaccine breakthrough COVID-19 infection                          | 0.25      | 65       | 26       | Suffering from food and drug allergies                                           | 0.2  | 74 | 22 |
| Experiencing COVID-19 infection before receiving any vaccine dose             | 0.26      | 65       | 26       | Being smoker                                                                     | 0.31 | 74 | 22 |
| Suffering from food and drug allergies                                        | 0.4       | 65       | 26       | Number of doses **^                                                              | 0.34 | 74 | 22 |
| Interval between receiving a COVID-19 vaccine and participating in this study | 0.54      | 66       | 26       | Interval between receiving a COVID-19 vaccine and participating in this study    | 0.56 | 73 | 20 |
| Education level                                                               | 0.75      | 65       | 26       | Gender                                                                           | 0.71 | 73 | 19 |
| Number of doses **^                                                           | 0.8       | 65       | 26       | Experiencing vaccine breakthrough COVID-19 infection **^                         | 0.78 | 74 | 19 |
| Experiencing COVID-19 vaccine hesitancy and related fears before vaccination  | 0.89      | 65       | 24       | Education level                                                                  | 0.91 | 73 | 17 |
| Gender**^                                                                     | 1.05      | 64       | 23       | Age                                                                              | 1.08 | 73 | 17 |
| Time of breakthrough infection                                                | 1.16      | 63       | 21       | Experiencing COVID-19 vaccine hesitancy and related fears before vaccination **^ | 1.08 | 73 | 17 |
| Age **^                                                                       | 1.55      | 63       | 21       | Time of breakthrough infection **^                                               | 1.67 | 73 | 15 |
| Suffering from chronic diseases                                               | 1.67      | 62       | 18       | Suffering from chronic diseases **^                                              | 1.69 | 72 | 13 |
| Type of COVID-19 vaccine **^                                                  | 2.15      | 62       | 18       | Country**^                                                                       | 2.12 | 73 | 11 |
| Country **^                                                                   | 2.24      | 60       | 9        | Type of COVID-19 vaccine **^                                                     | 2.44 | 73 | 4  |
| Critical features                                                             |           | 64       | 24       | Critical features                                                                |      | 73 | 19 |
| <b>Sleepiness and laziness</b>                                                | <b>FI</b> | <b>A</b> | <b>C</b> | FI, feature importance; A, accuracy; C, Cohen's value .                          |      |    |    |
| Being smoker                                                                  | 0.09      | 63       | 26       |                                                                                  |      |    |    |
| Experiencing vaccine breakthrough COVID-19 infection                          | 0.17      | 63       | 26       |                                                                                  |      |    |    |
| Being healthcare worker                                                       | 0.18      | 63       | 25       |                                                                                  |      |    |    |
| Number of doses                                                               | 0.24      | 63       | 25       |                                                                                  |      |    |    |
| Suffering from food and drug allergies                                        | 0.46      | 63       | 25       |                                                                                  |      |    |    |
| Interval between receiving a COVID-19 vaccine and participating in this study | 0.57      | 62       | 24       |                                                                                  |      |    |    |

|                                                                                  |      |    |    |
|----------------------------------------------------------------------------------|------|----|----|
| Education level                                                                  | 0.64 | 62 | 24 |
| Time of breakthrough infection                                                   | 0.64 | 62 | 23 |
| Experiencing COVID-19 infection before receiving any vaccine dose                | 0.75 | 63 | 25 |
| Experiencing COVID-19 vaccine hesitancy and related fears before vaccination **^ | 1.2  | 63 | 24 |
| Type of COVID-19 vaccine                                                         | 1.65 | 61 | 21 |
| Diseases                                                                         | 1.69 | 60 | 20 |
| Gender **^                                                                       | 1.81 | 60 | 20 |
| Age                                                                              | 1.83 | 58 | 14 |
| Country **^                                                                      | 2.03 | 58 | 14 |
| Critical features                                                                |      | 61 | 21 |
