# Supplementary material for: Reported Adverse Effects and Attitudes among Arab Populations Following COVID-19 Vaccination: A Large-Scale Multinational Study Implementing Machine Learning Tools in Predicting Post-Vaccination Adverse Effects Based on Predisposing Factors
Source: Vaccines (Basel). 2022 Feb 26;10(3):366. doi: 10.3390/vaccines10030366 (PMC8955470; doi:10.3390/vaccines10030366)
Supplement: Supplementary file 1 [file vaccines-10-00366-s001.zip › Survey tool-Arab.pdf]

---

## Survey of Side Effects and Perceptions Following COVID-19 Vaccination in the Arab World

- This survey aims to study the side effects appeared after receiving COVID-19 vaccines in the Arab world.
- This survey aims to study the perceptions of Arab people who received COVID-19 vaccines.
- This survey targets everyone received the first or second dose of any COVID-19 vaccines in the Arab world (regardless of the ethnicity, nationality, age, educational level...etc.).
- Elderly participants can ask a trusted person to assist, or to answer on behalf of them if necessary.
- This survey does not include the names or identifying information of participants.

---

### **SECTION 1: Participant consent**

By participating in this study, you are contributing in the awareness-raising efforts about the safety and protection of COVID-19 vaccines, and thus you will help others to protect themselves and to refute any false rumors about these vaccines.

**Do you agree to participate in this study?**

- ☐ Yes
- ☐ No

---

### **SECTION 2: Participant information**

**1. Gender:**

- ☐ Male
- ☐ Female

**2. Age category (years):**

- ☐ Below 20
- ☐ 20 – 39

- ☐ 40 – 59
- ☐ 60 years or above

**3. Educational level:**

- ☐ High school or below
- ☐ College or undergraduate
- ☐ Postgraduate

**4. Are you a healthcare worker?**

- ☐ Yes
- ☐ No

**5. Country of residence:**

- ☐ Algeria
- ☐ Bahrain
- ☐ Comoros
- ☐ Djibouti
- ☐ Egypt
- ☐ Iraq
- ☐ Jordan
- ☐ Kuwait
- ☐ Lebanon
- ☐ Libya
- ☐ Mauritania
- ☐ Morocco
- ☐ Oman
- ☐ Palestine
- ☐ Qatar
- ☐ Saudi Arabia
- ☐ Somalia
- ☐ Sudan
- ☐ Syria
- ☐ Tunisia
- ☐ United Arab Emirates

- ☐ Yemen

**6. Are you suffering from any of chronic diseases?**

*(You can select more than one choice)*

- ☐ No
- ☐ Diabetes mellitus
- ☐ Hypertension
- ☐ Cardiovascular diseases
- ☐ Respiratory diseases
- ☐ Obesity
- ☐ Joint inflammations
- ☐ Autoimmune diseases
- ☐ Thyroid disorders
- ☐ Cancer
- ☐ Other diseases (please specify): .....

**7. Are you a smoker (cigarettes or shisha)?**

- ☐ Yes
- ☐ No

**8. Are you suffering from an allergy to any types of foods or medicines?**

- ☐ Yes
- ☐ No

**9. Have you been infected with COVID-19 before vaccination?**

- ☐ Yes
- ☐ No

**10. Did you feel scared to receive a COVID-19 vaccine before vaccination?**

- ☐ Yes
- ☐ No

**11. Before vaccination, which type of COVID-19 vaccines did you prefer?**

- ☐ AstraZeneca/Oxford

- ☐ Pfizer-BioNTech
- ☐ Sinopharm
- ☐ Johnson & Johnson
- ☐ Moderna
- ☐ Sputnik V
- ☐ Covaxin
- ☐ I have no preference

**12. How did you know about COVID-19 vaccines?**

- ☐ Government-owned media platforms
- ☐ Social media platforms
- ☐ Friends and relatives
- ☐ Scientific and medical websites
- ☐ I have no information

**13. Which type of COVID-19 vaccines have you received?**

- ☐ AstraZeneca/Oxford
- ☐ Pfizer-BioNTech
- ☐ Sinopharm
- ☐ Johnson & Johnson
- ☐ Moderna
- ☐ Sputnik V
- ☐ Covaxin

**14. How many doses have you received so far?**

- ☐ Single dose
- ☐ Two doses

**15. Interval between receiving a COVID-19 vaccine and participating in this study:**

- ☐ Up to 3 weeks
- ☐ 3 – 8 weeks
- ☐ More than 8 weeks

**16. Have you got infected with COVID-19 after vaccination (vaccine breakthrough infection)?**

- ☐ Yes (answer question 17)
- ☐ No (move to question 18)

**17. If you experienced a COVID-19 vaccine breakthrough infection, please specify the time after vaccination?**

- ☐ During the first week
- ☐ Between one – three weeks
- ☐ More than three weeks

**18. Have you noticed any side effects following COVID-19 vaccination?**

- ☐ No side effects at all (*submit your answers*)
- ☐ Yes, mild side effects (*complete the next section*)
- ☐ Yes, moderate side effects (*complete the next section*)
- ☐ Yes, severe side effects (*complete the next section*)

**19. Do you think that COVID-19 vaccines are safe in the long term?**

- ☐ Yes
- ☐ No

**20. Do you feel more reassured after vaccination?**

- ☐ Yes
- ☐ No

**21. Do you think that the following of sterilization and social distance measures, as well as wearing medical face masks, is still necessary after vaccination?**

- ☐ Yes
- ☐ No

**22. Are you monitoring your vital signs more frequent after vaccination?**

- ☐ Yes
- ☐ No

**23. Do you advice others to get vaccinated for COVID-19?**

- ☐ Yes

☐ No

---

**SECTION 3: Side effects recorded after vaccination**

*(Please note that these side effects should be appeared suddenly and without known causes).*

**24. Have you felt tiredness and fatigue?**

☐ Yes

☐ No

**25. Have you experienced decreased sleep quality?**

☐ Yes

☐ No

**26. Have you felt a fever?**

☐ Yes

☐ No

**27. Have you felt a headache?**

☐ Yes

☐ No

**28. Have you experienced haziness or lack-of-clarity in your eyesight?**

☐ Yes

☐ No

**29. Have you experienced pain or swelling at the injection site?**

☐ Yes

☐ No

**30. Have you felt joints pain?**

☐ Yes

☐ No

**31. Have you experienced swollen ankles and feet?**

- ☐ Yes
- ☐ No

**32. Have you felt muscle pain (myalgia)?**

- ☐ Yes
- ☐ No

**33. Have you felt nausea?**

- ☐ Yes
- ☐ No

**34. Have you felt abdominal pain?**

- ☐ Yes
- ☐ No

**35. Have you experienced diarrhea?**

- ☐ Yes
- ☐ No

**36. Have you experienced vomiting?**

- ☐ Yes
- ☐ No

**37. Have you noticed any bruises on your body?**

- ☐ Yes
- ☐ No

**38. Have you experienced bleeding gums?**

- ☐ Yes
- ☐ No

**39. Have you experienced a nosebleed?**

- ☐ Yes
- ☐ No

**40. Have you felt chills?**

- ☐ Yes
- ☐ No

**41. Have you experienced irritation and allergic skin reactions, or itchy skin?**

- ☐ Yes
- ☐ No

**42. Have you noticed that your body sweats for no reason?**

- ☐ Yes
- ☐ No

**43. Have you felt cold, numbness and tingling in limbs?**

- ☐ Yes
- ☐ No

**44. Have you felt dizzy?**

- ☐ Yes
- ☐ No

**45. Have you felt a clogged nose?**

- ☐ Yes
- ☐ No

**46. Have you felt a runny nose?**

- ☐ Yes
- ☐ No

**47. Have you felt dyspnea?**

- ☐ Yes
- ☐ No

**48. Have you felt chest pain?**

- ☐ Yes

☐ No

**49. Have you felt over sleepiness or laziness?**

☐ Yes

☐ No

**50. Have you felt faster or irregular heartbeats?**

☐ Yes

☐ No

**51. Have you experienced an increase or decrease in blood pressure?**

☐ Yes

☐ No

**52. Have you felt a sore or dry throat?**

☐ Yes

☐ No

**53. Have you experienced a cough?**

☐ Yes

☐ No

**54. How soon did the side effects appear after injection with a COVID-19 vaccine?**

☐ Up to 4 hours

☐ 5 to 12 hours

☐ 13 to 24 hours

☐ 24 hours or more

**55. How long did the side effects last?**

☐ Less than one day

☐ 1 to 3 days

☐ 4 to 7 days

☐ More than 7 days

**56. Please write down any other side affects you have experienced:**

(Optional)

.....  
.....

**57. How did you act to relieve the side effects that appeared after vaccination?**

- ☐ I took a rest at home (*submit your answers*)
  - ☐ I took painkillers while staying rested at home (*submit your answers*)
  - ☐ I went to a doctor's clinic, but there was no need for hospitalization (*answer the next section*)
  - ☐ I have been admitted to a hospital, and I received the required healthcare services (*answer the next question*)
- 

**SECTION 4: After visiting a doctor or hospital**

**58. Please write down those side effects caused a visit to doctor or hospitalization:**

.....  
.....

**59. Have you been diagnosed with any types of thrombosis (blood clots)?**

- ☐ Yes
- ☐ No

**60. Have you been diagnosed with low platelet count (thrombocytopenia)?**

- ☐ Yes
- ☐ No
